# Supplementary material for: EMMPRIN/CD147 plays a detrimental role in clinical and experimental ischemic stroke
Source: publisher site journal article supplement (doi:10.18632/aging.102935), 2020-03-19
Supplement: Supplementary file [file aging-v12i6-102935-supplementary-material-SD1.pdf]

## SUPPLEMENTARY TABLE

**Supplementary Table 1. Demographics and comorbidities of human post mortem stroke cases.**

| <b>Variable</b>                | <b>Measure</b> |
|--------------------------------|----------------|
| Age (yrs)                      | 67 (58.7-80.2) |
| Gender (male)                  | 74 (58.9%)     |
| Heart Disease                  | 42 (33.1%)     |
| Atrial Fibrillation            | 30 (23.1%)     |
| Diabetes Mellitus              | 45 (34.6%)     |
| High Cholesterol               | 91 (70.0%)     |
| Hypertension                   | 104 (80.0%)    |
| Smoking                        | 26 (20%)       |
| Arthritis                      | 13 (10%)       |
| <b>Subtype:</b>                |                |
| Large vessel                   | 9 (17.65%)     |
| Cardioembolic                  | 17 (33.33%)    |
| Small vessel                   | 19 (37.25%)    |
| <b>Stroke Severity (NIHSS)</b> |                |
| Mild: $\leq 4$                 | 70 (53.8%)     |
| Moderate: $\geq 5 \leq 12$     | 30 (23.1%)     |
| Severe: $\geq 13$              | 30 (23.1%)     |
